# Supplementary material for: Lassa Fever in Post-Conflict Sierra Leone
Source: PLoS Negl Trop Dis. 2014 Mar 20;8(3):e2748. doi: 10.1371/journal.pntd.0002748 (PMC3961205; doi:10.1371/journal.pntd.0002748)
Supplement: Table S7 — (corresponds to Figs. 7c and 7d ): Logistic regression results showing pregnancy ratios and serostatus case fatality ratios by self-reported pregnancy status. This table provides confidence intervals and p values for the data presented in Figure 7c and 7d. (DOC) [file pntd.0002748.s008.doc]

**Table S7. Logistic regression results showing pregnancy ratios and case fatality**

**ratios by self-reported pregnancy status (corresponds to Figs. 7c and 7d):**

| **Corresponding figure** | **Comparison** | **OR (95% CI)** | ***p*** |
| --- | --- | --- | --- |
| 7ca,b | Ag+/IgM- vs. Ag+/IgM+ | 0.6 (0.2, 1.6) | .303 |
|  | vs. Ag-/IgM+ | 2.4 (1.1, 5.1) | .026 |
|  | vs. Ag-/IgM- | 4.9 (2.4, 10.0) | <.001 |
|  | Ag+/IgM+ vs. Ag-/IgM+ | 4.1 (1.6, 10.8) | .004 |
|  | vs. Ag-/IgM- | 8.4 (3.3, 21.2) | <.001 |
|  | Ag-/IgM+ vs. Ag-/IgM- | 2.1 (1.1, 3.8) | .024 |
| 7da,c | Ag+/IgM- vs. Ag+/IgM+, pregnant | 10.4 (0.9, 117.2) | .058 |
|  | vs. Ag-/IgM+, pregnant | 13.0 (1.1, 152.3) | .041 |
|  | vs. Ag-/IgM-, pregnant | 19.5 (1.3, 292.7) | .032 |
|  | Ag+/IgM+ vs. Ag-/IgM+, pregnant | 1.3 (0.2, 8.4 ) | .819 |
|  | vs. Ag-/IgM-, pregnant | 1.9 (0.2, 17.3) | .579 |
|  | Ag-/IgM+ vs. Ag-/IgM-, pregnant | 1.5 (0.2, 14.4) | .726 |
|  | Ag+/IgM- vs. Ag+/IgM+, NP | 1.1 (0.3, 4.1) | .894 |
|  | vs. Ag-/IgM+, NP | 5.1 (2.0, 13.2) | <.001 |
|  | vs. Ag-/IgM-, NP | 5.4 (2.0, 14.8) | .001 |
|  | Ag+/IgM+ vs. Ag-/IgM+, NP | 4.7 (1.3, 16.9) | .018 |
|  | vs. Ag-/IgM-, NP | 5.0 (1.3, 18.7) | .018 |
|  | Ag-/IgM+ vs. Ag-/IgM-, NP | 1.1 (0.4, 2.7) | .904 |
|  | Pregnant vs. NP, Ag+/IgM- | 7.4 (0.9, 64.0) | .068 |
|  | Pregnant vs. NP, Ag+/IgM+ | 0.8 (0.1, 4.4) | .779 |
|  | Pregnant vs. NP, Ag-/IgM+ | 2.9 (0.6, 13.4) | .167 |
|  | Pregnant vs. NP, Ag-/IgM- | 2.1 (0.3, 14.2) | .460 |

*Note*. OR = odds ratio; CI = confidence interval; NP = nonpregnant.

aSample covers females between 15 and 40 years of age. bAssociated ORs expressed as the odds of observed pregnancy on presentation relative to the reference group. cAssociated ORs expressed as the odds of a fatal outcome relative to the reference group.
